# Supplementary material
Source: publisher figshare collection journal article supplement (https://acs.figshare.com/ndownloader/files/3860569)
Supplement: Supplementary file 1 [file 3860569]

Supporting Information for

## An NMR flow-tube for online NMR reaction monitoring

*David A. Foley,<sup>a</sup> Eckhard Bez,<sup>b</sup> Anna Codina,<sup>c</sup> Kimberly L. Colson,<sup>b</sup> Michael Fey,<sup>b</sup> Robert Krull,<sup>b</sup> Don Pirola,<sup>b</sup> Mark T. Zell,<sup>a</sup> and Brian L. Marquez<sup>a,\*†</sup>*

<sup>a</sup>Analytical Research and Development, Pfizer Worldwide Research and Development, 445 Eastern Point Road., Groton, CT 06340, USA

<sup>b</sup>Bruker BioSpin, 15 Fortune Drive, Billerica MA 01821, USA

<sup>c</sup>Bruker UK Limited, Banner Lane, Coventry CV4 9GH, United Kingdom

### Abstract

Results of flow rate (Figure S-1 and S-2) and residence time distribution (Figure S-3) experiments.

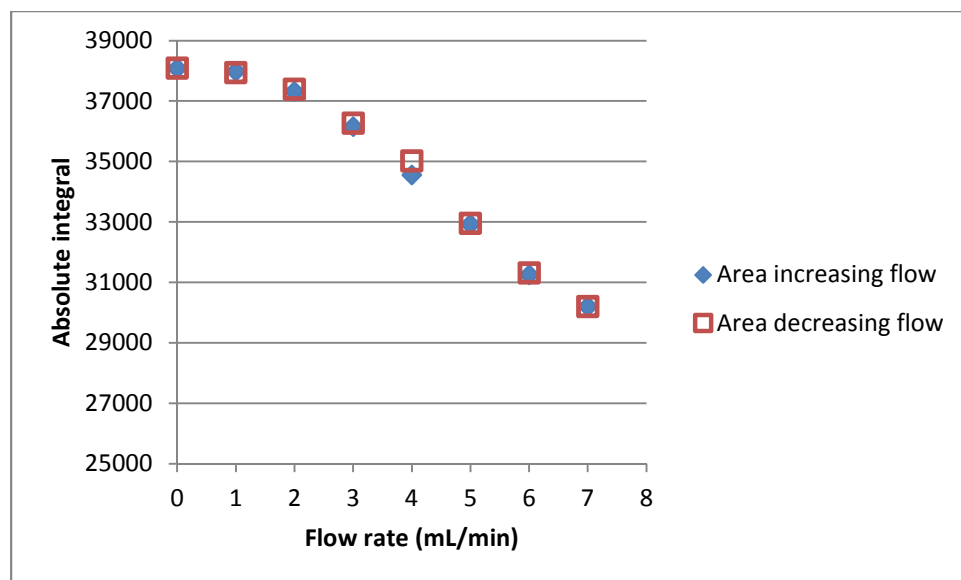

Figure S-1. The effect of flow rate on the absolute integral of *t*-BuOH C(CH<sub>3</sub>)<sub>3</sub> resonance. The flow rate was altered in 1 mL/min increments from 0 mL/min to 7 mL/min and was then decreased back to 0 mL/min. The integral was determined for both increasing and decreasing flow rates.

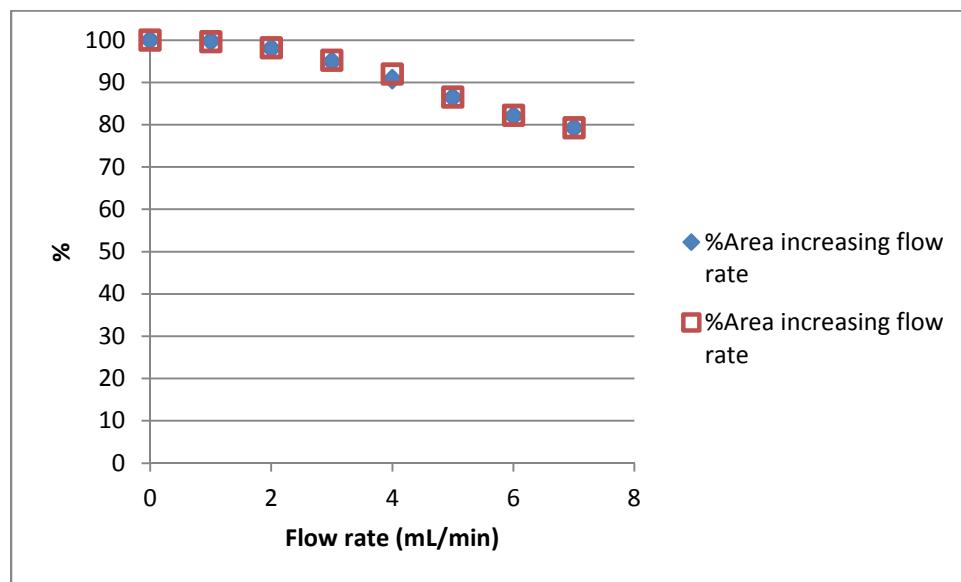

Figure S-2. The effect of flow rate on the relative % signal of *t*-BuOH C(CH<sub>3</sub>)<sub>3</sub> resonance. The flow rate was altered in 1 mL/min increments from 0 mL/min to 7 mL/min and was then decreased back to 0 mL/min. The integral was determined for both increasing and decreasing flow rates. The relative % signal was calculated by dividing the absolute integral under flow conditions by that under non-flow and conversion to percent.

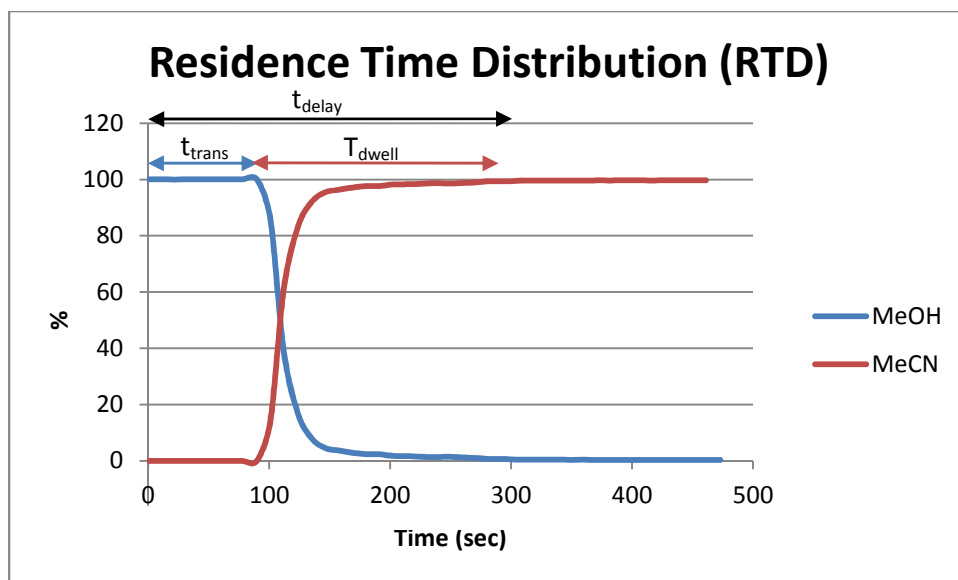

Figure S-3. Replacement of solution to measure the RTD function. The delay time  $t_{\text{delay}}$  is the sum of the transfer time  $t_{\text{trans}}$  and the residence time  $t_{\text{dwell}}$  in the flow tube.

$$\bar{t}_{\text{res}} = t_{\text{trans}} + (t_{\text{dwell}}/2)$$

$$\bar{t}_{\text{res}} = 90 + (200/2) = 190 \text{ sec} = 3.2 \text{ min}$$
